# Supplementary material for: Influence of Previous COVID-19 and Mastitis Infections on the Secretion of Brain-Derived Neurotrophic Factor and Nerve Growth Factor in Human Milk
Source: MDPI journal article supplement (doi:10.3390/ijms22083846), 2021-04-08
Supplement: s1 [file s1]

**Table S1.** Participant characteristics<sup>1</sup> with a confirmed COVID-19 PCR test (PCR-M1 to PCR-M12) or with viral symptoms suggestive of COVID-19 (Viral-M1 to Viral-M13) without PCR testing.

| <b>Mothers</b>  | <b>Confirmed RNA-SARS-CoV-2/PCR</b> | <b>Symptoms of viral infection</b>                   | <b>Time from infection to collection (mo)</b> | <b>Infant gender</b> | <b>Lactation time (months)</b> | <b>Maternal age</b> |
|-----------------|-------------------------------------|------------------------------------------------------|-----------------------------------------------|----------------------|--------------------------------|---------------------|
| <b>PCR-M1</b>   | +COVID19-PCR                        | Fever, fatigue, cough                                | 4.1                                           | Female               | 5                              | 36                  |
| <b>PCR-M2</b>   | +COVID-19-PCR                       | NA                                                   | 1.8                                           | Female               | 6                              | 26                  |
| <b>PCR-M3</b>   | +COVID-19-PCR                       | NA                                                   | 1.7                                           | Female               | 6                              | 26                  |
| <b>PCR-M4</b>   | +COVID-19-PCR                       | NA                                                   | 0.9                                           | Male                 | 5                              | 33                  |
| <b>PCR-M5</b>   | +COVID-19-PCR                       | NA                                                   | 0.5                                           | Male                 | 8                              | 37                  |
| <b>PCR-M6</b>   | +COVID-19-PCR                       | Loss of smell/taste, fever, headache                 | 0.5                                           | Male                 | 10                             | 37                  |
| <b>PCR-M7</b>   | + COVID-19-PCR                      | NA                                                   | 1.3                                           | Male                 | 6                              | 33                  |
| <b>PCR-M8</b>   | +COVID-19-PCR                       | NA                                                   | 3.7                                           | Female               | 6                              | 26                  |
| <b>PCR-M9</b>   | +COVID-19-PCR                       | Fever, fatigue, cough                                | 1.3                                           | Female               | 4                              | 30                  |
| <b>PCR-M10</b>  | +COVID-19-PCR                       | headache, cough, fatigue, fever, loss of taste/smell | 0.6                                           | Female               | 10                             | 27                  |
| <b>PCR-M11</b>  | +COVID-19-PCR                       | headache, loss of smell, fever                       | 0.8                                           | Male                 | 4                              | 33                  |
| <b>PCR-M12</b>  | +COVID-19-PCR                       | headache, loss of smell, fever                       | 1                                             | Male                 | 4                              | 32                  |
| <b>Viral-M1</b> | Absence of PCR-testing              | Fever, chills, cough, body aches, nasal congestion   | 2.9                                           | Female               | 6                              | 32                  |

|                  |                        |                                                            |     |        |     |    |
|------------------|------------------------|------------------------------------------------------------|-----|--------|-----|----|
| <b>Viral-M2</b>  | Absence of PCR-testing | Fever, fatigue, and cough                                  | 1.7 | Female | 4   | 30 |
| <b>Viral-M3</b>  | Absence of PCR-testing | Fever and cough                                            | 3.8 | Female | 5   | 29 |
| <b>Viral-M4</b>  | Absence of PCR-testing | Extreme fatigue, fever, nasal congestion, cough            | 3.3 | Female | 5   | 40 |
| <b>Viral-M5</b>  | Absence of PCR-testing | Fever, cough, some nasal congestion, headache              | NA  | Female | 5   | 30 |
| <b>Viral-M6</b>  | Absence of PCR-testing | Body aches and respiratory infection                       | NA  | Male   | NA  | NA |
| <b>Viral-M7</b>  | Absence of PCR-testing | Cough lasted 4+ weeks, fever, body aches                   | 3.4 | Male   | 5   | 33 |
| <b>Viral-M8</b>  | Absence of PCR-testing | Severe respiratory infection, cough for 6 weeks, low fever | 2.3 | Male   | 5   | 32 |
| <b>Viral-M9</b>  | Absence of PCR-testing | Sneezing, headache, fever, vomit, runny nose               | 3.9 | Female | 5.5 | 23 |
| <b>Viral-M10</b> | Absence of PCR-testing | Fever                                                      | 3.3 | Male   | 9   | 40 |
| <b>Viral-M11</b> | Absence of PCR-testing | Nasal congestion                                           | 3.2 | Male   | 8   | 33 |
| <b>Viral-M12</b> | Absence of PCR-testing | Nasal congestion and fever                                 | 2.6 | Female | 8   | 34 |
| <b>Viral-M13</b> | Absence of PCR-testing | fever, headache, nasal congestion, loss of smell/taste     | 2.8 | Female | 4   | 30 |

<sup>1</sup> Women did not have medical history, medication, and systematic diseases
